# Supplementary material
Source: Research Square preprint supplement (doi:10.21203/rs.3.rs-8891155/v1)
Supplement: Supplementary file 1 [file b4586f1469ee2d5b631b5fe9.docx]

**Supplementary appendix 1** Sociodemographic characteristics of the community people (n = 192)

| **Variables** | **n (%)** |
| --- | --- |
| **Age (years)** |  |
| 18 to 87 (mean (SD)) | 43.515.4 |
| **Gender** |  |
| Female | 164 (85.4) |
| Male | 28 (14.6) |
| **Occupation** |  |
| Labour/ unemployed | 13 (6.8) |
| Business | 10 (5.2) |
| Housewife | 149 (77.6) |
| Others | 20 (10.4) |
| **Educational status** (n=191) |  |
| Primary (not completed) | 38 (19.8) |
| Primary (completed) | 72 (37.5) |
| Secondary level (completed) | 57 (29.7) |
| Higher secondary level (completed) | 18 (9.4) |
| Graduate level completed or above | 6 (3.1) |
| **Receive any health education ever** (n=191) |  |
| Yes | 33 (17.2) |
| No | 158 (82.3) |

**Supplemental appendix 2** The health champion's experiences with educational intervention

| **Q1: How do you feel to get health education and become a health champion?** | | |
| --- | --- | --- |
| Categories, (n = 49) | | Direct Quotes |
| Overcome psychological barriers | Less self-confidence, shyness, hesitation | "While providing health education, my self-confidence increased a lot. Earlier, I used to feel hesitant to speak in front of people, but now I can speak confidently."  "What I liked most about working as a health champion is that I was able to overcome my own shyness and hesitation. At our age, many people feel embarrassed to talk about certain health topics. But when I explained things to other girls in a simple way, they also stopped feeling shy and started asking questions. This made me much more confident." |
| Sense of joy | Motivated, enjoyed, task satisfaction | "I am very happy to have become a health champion and to have worked as a health worker."  "I felt very good being a health champion. Talking to people, raising their awareness, and teaching them new things about health was truly enjoyable." |
| Sense of being empowered | Proud to be a health champion | "I feel proud thinking that, as a health champion, I will be able to make the people in my community and my family aware of their health by giving them proper advice."  "I felt very good being a health champion. Talking to people, raising their awareness, and teaching them new things about health was truly enjoyable." |
| Sense of responsibility | Responsibility and opportunity to bring positive change, messenger of hope | "Working as a health champion has been deeply satisfying and inspiring. It is not just a job—it is a responsibility and an opportunity to bring positive change to people’s lives."  "When I see that the people I am teaching are improving their quality of life, I feel an inner strength and a sense of pride. It feels like I am not just a health worker, but a messenger of hope." |
| **Q2. Did you face any problem in providing health education? If faced, how did you solve this?** | | |
| Categories (n = 34) | Solution | Direct Quotes |
| Shyness (community people) | Discussing the topics separately in small groups, talk with them in a friendly manner and use pictures, posters, and stories to explain the information | "The challenge was that many felt shy at first. Later, discussing the topics separately in small groups helped to overcome this problem." "At first, some girls felt shy. Later, I used pictures, posters, and stories to explain. This helped them understand better, and their participation also increased. |
| lack of interest (community people) | Provide real-life examples | "The biggest challenge while giving health education was that many of them thought these topics were boring. But when I used examples related to their own lives (such as sports, studies, mobile phone habits), they became interested." |
| Changing community people's eating habits | Introducing healthier alternatives and helping them set personal goals | "One of the major challenges after becoming a health champion was changing their eating habits." |
| Misconceptions and superstitions | Used scientific explanation, patience, and positive discussion | "The main problem I faced was that some people believed in misconceptions. I listened to them patiently and then explained using scientific information. As a result, they were able to let go of those misconceptions. This was a great achievement for me."  "Some people initially did not show much interest in health. Breaking many misconceptions or superstitions was difficult." |
| Lack of time (community people) | Important information often had to be shared in small parts and used simple language | "Due to work or daily responsibilities, many people could not listen to the full session. As a result, important information often had to be shared in small parts."  "Some were too busy to listen attentively throughout the session." |
| Took time to understand health information | Used illustrations and real-life examples to make it easier for community people | "Explaining things to everyone together and taking time to make them understand sometimes becomes quite challenging." |
